# Supplementary material for: Effects of environmental enrichment upon ethanol-induced conditioned place preference and pre-frontal BDNF levels in adolescent and adult mice
Source: PubMed Central journal article supplement (PMC5561235; doi:10.1038/s41598-017-08795-0), 2017-08-17
Supplement: 41598_2017_8795_MOESM1_ESM.pdf [file 41598_2017_8795_MOESM1_ESM.pdf]

**Effects of environmental enrichment upon ethanol-induced conditioned place preference and pre-frontal bdnf levels in adolescent and adult mice. RM Pautassi, AB Suárez, L Barbosa Hoffmann, AV Rueda, M Rae, P Marianno & R Camarini**

**Supplementary Figure S1.** Ethanol-induced conditioned place preference (CPP) in adolescent male Swiss mice, at test sessions 1, 2, 3 and 4. The graphs depict differential CPP scores (i.e., time spent in the CS+ compartment at each test session – time spent in the CS+ during habituation, seconds) as a function of rearing condition (standard [control] conditions and environmental enrichment; SC and EE groups, respectively) and treatment during CPP training (vehicle or 2.0 g/kg ethanol). Values express mean  $\pm$  SEM. The table presents the ANOVA table of effects. There were no significant main effects or significant interactions.

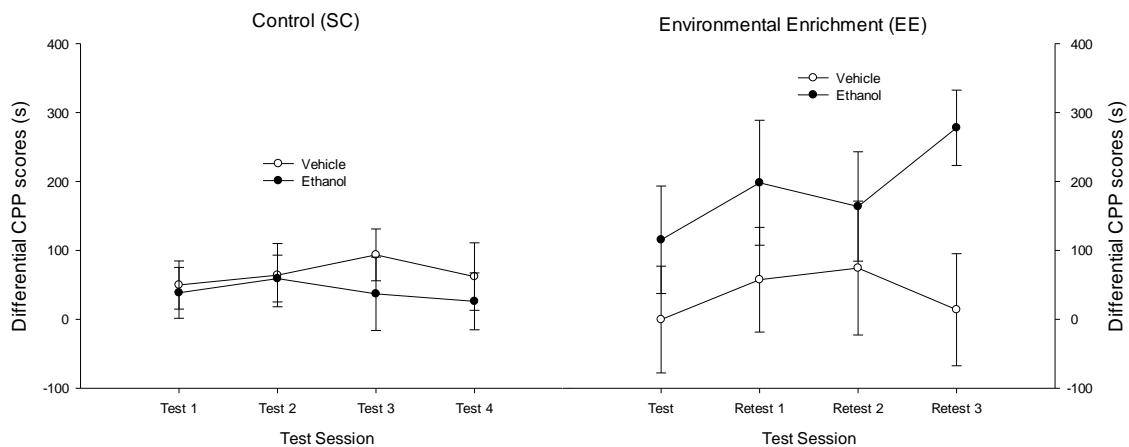

| Effect                         | Repeated Measures Analysis of Variance with Effect Sizes and Powers |                  |         |          |          |                     |                |                             |
|--------------------------------|---------------------------------------------------------------------|------------------|---------|----------|----------|---------------------|----------------|-----------------------------|
|                                | SS                                                                  | Degr. of Freedom | MS      | F        | p        | Partial eta-squared | Non-centrality | Observed power (alpha=0.05) |
| Intercept                      | 1021212                                                             | 1                | 1021212 | 9,176745 | 0,004736 | 0,217578            | 9,176745       | 0,836488                    |
| Rearing Conditions             | 127661                                                              | 1                | 127661  | 1,147182 | 0,291911 | 0,033595            | 1,147182       | 0,180170                    |
| Treatment                      | 144915                                                              | 1                | 144915  | 1,302221 | 0,262022 | 0,037963            | 1,302221       | 0,198230                    |
| Rearing Conditions*Treatment   | 297782                                                              | 1                | 297782  | 2,675912 | 0,111381 | 0,075006            | 2,675912       | 0,355256                    |
| Error                          | 3672327                                                             | 33               | 111283  |          |          |                     |                |                             |
| M                              | 51687                                                               | 3                | 17229   | 1,450886 | 0,232673 | 0,042115            | 4,352658       | 0,373921                    |
| M*Rearing Conditions           | 36869                                                               | 3                | 12290   | 1,034929 | 0,380592 | 0,030408            | 3,104786       | 0,273406                    |
| M*Treatment                    | 45420                                                               | 3                | 15140   | 1,274957 | 0,287201 | 0,037198            | 3,824871       | 0,331545                    |
| M*Rearing Conditions*Treatment | 45057                                                               | 3                | 15019   | 1,264776 | 0,290694 | 0,036912            | 3,794328       | 0,329080                    |
| Error                          | 1175609                                                             | 99               | 11875   |          |          |                     |                |                             |

**Effects of environmental enrichment upon ethanol-induced conditioned place preference and pre-frontal bdnf levels in adolescent and adult mice. RM Pautassi, AB Suárez, L Barbosa Hoffmann, AV Rueda, M Rae, P Marianno & R Camarini**

**Supplementary Figure S2.** Ethanol-induced conditioned place preference (CPP) in adult male Swiss mice, at test sessions 1, 2, 3 and 4. The graphs depict differential CPP scores (i.e., time spent in the CS+ compartment at each test session – time spent in the CS+ during habituation, seconds) as a function of rearing condition (standard [control] conditions and environmental enrichment; SC and EE groups, respectively) and treatment during CPP training (vehicle or 2.0 g/kg ethanol). Values express mean  $\pm$  SEM. The table presents the ANOVA table of effects. There were no significant main effects or significant interactions.

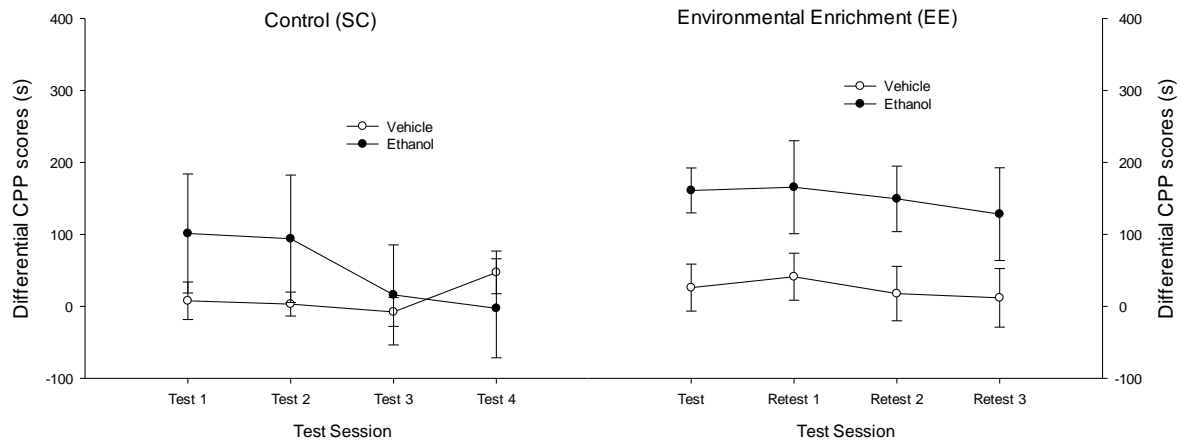

| Effect                             | Repeated Measures Analysis of Variance with Effect Sizes and Powers |                  |                 |                 |                 |                     |                 |                             |
|------------------------------------|---------------------------------------------------------------------|------------------|-----------------|-----------------|-----------------|---------------------|-----------------|-----------------------------|
|                                    | SS                                                                  | Degr. of Freedom | MS              | F               | p               | Partial eta-squared | Non-centrality  | Observed power (alpha=0,05) |
| <b>Intercept</b>                   | <b>403991,1</b>                                                     | <b>1</b>         | <b>403991,3</b> | <b>7,139505</b> | <b>0,011492</b> | <b>0,173544</b>     | <b>7,139505</b> | <b>0,737585</b>             |
| Rearing Conditions                 | 192646                                                              | 1                | 192646,3        | 3,404527        | 0,073743        | 0,091019            | 3,404527        | 0,433778                    |
| Treatment                          | 168572                                                              | 1                | 168572,3        | 2,979081        | 0,093426        | 0,080561            | 2,979081        | 0,388842                    |
| Rearing Conditions*Treatment       | 135120                                                              | 1                | 135120,3        | 2,387903        | 0,131536        | 0,065624            | 2,387903        | 0,323658                    |
| Error                              | 1923901                                                             | 34               | 56585,3         |                 |                 |                     |                 |                             |
| TESTS                              | 7241                                                                | 3                | 2413,6          | 0,328336        | 0,804866        | 0,009565            | 0,985007        | 0,111949                    |
| TESTS*Rearing Conditions           | 9229                                                                | 3                | 3076,4          | 0,418494        | 0,740107        | 0,012159            | 1,255482        | 0,130915                    |
| TESTS*Treatment                    | 14954                                                               | 3                | 4984,6          | 0,678078        | 0,567434        | 0,019554            | 2,034235        | 0,188894                    |
| TESTS*Rearing Conditions*Treatment | 6792                                                                | 3                | 2263,9          | 0,307970        | 0,819575        | 0,008977            | 0,923910        | 0,107767                    |
| Error                              | 749804                                                              | 102              | 7351,0          |                 |                 |                     |                 |                             |
